# Supplementary material
Source: PubMed Central journal article supplement (PMC2738428)
Supplement: pr900491n_si_001.pdf [file pr900491n_si_001.pdf]

Table S1 Human proteins identified by yeast two hybrid screening with Vaccinia WR strain proteins

| Bait protein name (Copenhagen nomenclature) and description              | Bait A.A. coordinates | Prey protein name and description                                | Prey A.A. coordinates | Library                           |
|--------------------------------------------------------------------------|-----------------------|------------------------------------------------------------------|-----------------------|-----------------------------------|
| WR001(COP-C23) chemokine-binding protein                                 | 1-245                 | EIF2S2 (eukaryotic translation initiation factor 2)              | 25-169                | Breast_cancer/<br>Prostate_cancer |
|                                                                          |                       | HNRPAB (heterogeneous nuclear ribonucleoprotein A/B)             | 213-331               | Breast_cancer/<br>Prostate_cancer |
|                                                                          |                       | KRT4 (keratin 4)                                                 | 206-397               | Tongue_and_<br>Tonsil             |
|                                                                          |                       |                                                                  | 275-397               | Tongue_and_<br>Tonsil             |
|                                                                          |                       | PHLDA1(pleckstrin homology-like domain, family A, member 1)      | 302-400               | Breast_cancer/<br>Prostate_cancer |
|                                                                          |                       | PPIG (peptidyl-prolyl isomerase G)                               | 605-695               | Breast_cancer/<br>Prostate_cancer |
|                                                                          |                       | RL21(ribosomal protein L21)                                      | 57-160                | Breast_cancer/<br>Prostate_cancer |
|                                                                          |                       | UBC (ubiquitin C)                                                | 1-677                 | Breast_cancer/<br>Prostate_cancer |
| ZC3H11A (zinc finger CCCH-type containing 11A)                           | 170-346               | Breast_cancer/<br>Prostate_cancer                                |                       |                                   |
| WR002 (no COP ortholog)<br>Gene fragment, Tumor necrosis factor receptor | 1-62                  | CRYAB (crystallin, alpha B)                                      | -8-176                | Tongue_and_<br>Tonsil             |
|                                                                          |                       | DNAJB6 (DnaJ (Hsp40) homolog, subfamily B, member 6)             | 27-242                | Tongue_and_<br>Tonsil             |
|                                                                          |                       | HSPB1 (heat shock 27 kD protein 1)                               | -4-206                | Tongue_and_<br>Tonsil             |
| WR019 (COP-C9)<br>ankyrin-like protein                                   | 1-250                 | LSM4 (U6 snRNA-associated Sm-like protein)                       | 5-139                 | Breast_cancer/<br>Prostate_cancer |
| WR021 (COP-C7)host-range;<br>possible host defense modulator             | 10-130                | YAF2 (YY1-associated factor 2)                                   | 67-181                | Tongue/Tonsil                     |
| WR022 (COP-C6)<br>Unknown function                                       | 1-152                 | AP1GBP1 (AP1 gamma subunit binding protein 1)                    | -10-602               | Tongue_and_<br>Tonsil             |
|                                                                          |                       | AP2B1 (adaptor-related protein complex 2, beta 1 subunit)        | 85-337                | Tongue_and_<br>Tonsil             |
|                                                                          |                       | ATP5F1 (ATP synthase, H+ transporting, mitochondrial F0 complex) | 123-253               | Tongue_and_<br>Tonsil             |
|                                                                          |                       |                                                                  | 128-231               | Breast_cancer/<br>Prostate_cancer |
|                                                                          |                       | AUP1 (ancient ubiquitous protein 1)                              | 327-464               | Breast_cancer/<br>Prostate_cancer |
|                                                                          |                       | BRMS1 (breast cancer metastasis suppressor 1, isoform 1)         | 31-103                | Breast_cancer/<br>Prostate_cancer |

|  |                                                           |           |                                   |
|--|-----------------------------------------------------------|-----------|-----------------------------------|
|  | CDC42BPB (CDC42-binding protein kinase beta)              | 410-704   | Breast_cancer/<br>Prostate_cancer |
|  | CEP110(entrosomal protein 110 kDa)                        | 2097-2326 | Spleen                            |
|  | CGRRF1 (cell growth regulator with ring finger domain 1)  | 54-333    | Tongue_and_<br>Tonsil             |
|  | CHERP (calcium homeostasis endoplasmic reticulum protein) | -26-165   | Breast_cancer/<br>Prostate_cancer |
|  | CTNNA1 (catenin, alpha 1, alt. transcript)                | 241-372   | Tongue_and_<br>Tonsil             |
|  | CTNNBIP1 (catenin, beta interacting protein 1)            | -22-82    | Tongue_and_<br>Tonsil             |
|  |                                                           | 21-82     | Tongue_and_<br>Tonsil             |
|  | EXOC7 (exocyst complex component 7)                       | 2-262     | Tongue_and_<br>Tonsil             |
|  | FYCO1 (FYVE and coiled-coil domain containing 1)          | 215-375   | Tongue_and_<br>Tonsil             |
|  |                                                           | 174-412   | Breast_cancer/<br>Prostate_cancer |
|  | GPS2 (G protein pathway suppressor 2)                     | 32-202    | Tongue_and_<br>Tonsil             |
|  | KLC3 (kinesin light chain 3)                              | 126-281   | Breast_cancer/<br>Prostate_cancer |
|  | KRT4(keratin 4)                                           | 144-411   | Tongue_and_<br>Tonsil             |
|  |                                                           | 140-396   | Tongue_and_<br>Tonsil             |
|  |                                                           | 113-411   | Tongue_and_<br>Tonsil             |
|  | MBD2 (methyl-CpG binding domain protein 2)                | 221-412   | Tongue_and_<br>Tonsil             |
|  | MYH14 (myosin, heavy chain 14)                            | 1469-1682 | Tongue_and_<br>Tonsil             |
|  | Nexilin (F actin binding protein; NELIN)                  | -9-73     | Tongue_and_<br>Tonsil             |
|  | OFD1 (oral-facial-digital syndrome 1)                     | 245-508   | Breast_cancer/<br>Prostate_cancer |
|  | PDCD6IP (programmed cell death 6 interacting protein)     | 455-700   | Tongue_and_<br>Tonsil             |
|  | PDE4DIP (phosphodiesterase 4D interacting protein)        | 486-805   | Tongue_and_<br>Tonsil             |
|  | RAD50 (RAD50 homolog)                                     | 416-753   | Tongue_and_<br>Tonsil             |
|  |                                                           | 515-745   | Spleen                            |
|  | RANBP2 (RAN binding protein 2)                            | 823-1255  | Tongue_and_<br>Tonsil             |
|  | RMP (RBP5-mediating protein, isoform a)                   | 120-297   | Tongue_and_<br>Tonsil             |
|  | RUNDC1 (RUN domain containing 1)                          | 163-314   | Breast_cancer/<br>Prostate_cancer |

|                                                   |       |                                                                      |           |                               |
|---------------------------------------------------|-------|----------------------------------------------------------------------|-----------|-------------------------------|
|                                                   |       | SEPT6 (septin 6, isoform A)                                          | 208-383   | Tongue_and_Tonsil             |
|                                                   |       | SEPT8 (septin 8, alt. transcript)                                    | 218-428   | Tongue_and_Tonsil             |
|                                                   |       | SFPQ (splicing factor proline/glutamine-rich)                        | 501-694   | Breast_cancer/Prostate_cancer |
|                                                   |       | SLK (STE20-like kinase, alt. transcript)                             | 741-1013  | Tongue_and_Tonsil             |
|                                                   |       |                                                                      | 738-928   | Breast_cancer/Prostate_cancer |
|                                                   |       | STRN (striatin, calmodulin binding protein)                          | 78-352    | Tongue_and_Tonsil             |
|                                                   |       | SYNE2 (spectrin repeat containing, nuclear envelope 2, isoform 1)    | 1685-2025 | Tongue_and_Tonsil             |
|                                                   |       | TCHP (trichoplein, keratin filament binding)                         | 192-396   | Tongue_and_Tonsil             |
|                                                   |       | TNNI2 (troponin I, skeletal, fast)                                   | -8-149    | Tongue_and_Tonsil             |
|                                                   |       | TRIM11 (tripartite motif-containing 11)                              | 6-279     | Spleen                        |
|                                                   |       | TTN (titin, isoform novex-1)                                         | 25273-    | Tongue_and_Tonsil             |
|                                                   |       |                                                                      | 25533     |                               |
|                                                   |       | USF2 (upstream stimulatory factor 2, isoform 2)                      | 202-280   | Breast_cancer/Prostate_cancer |
|                                                   |       |                                                                      | 200-280   | Spleen                        |
|                                                   |       | VASP (vasodilator-stimulated phosphoprotein)                         | 228-381   | Spleen                        |
|                                                   |       | XPA (xeroderma pigmentosum, complementation group A)                 | 49-257    | Spleen                        |
| WR026 (COP-C2)<br>kelch-like intracellular ptoein | 1-250 | CRYAB (crystallin, alpha B)                                          | 12-176    | Tongue_and_Tonsil             |
|                                                   |       |                                                                      | 32-176    | Tongue_and_Tonsil             |
|                                                   |       |                                                                      | -8-176    | Tongue_and_Tonsil             |
|                                                   |       | HSPB1 (heat shock 27 kD protein 1)                                   | -4-206    | Tongue_and_Tonsil             |
|                                                   |       |                                                                      | 1-206     | Tongue_and_Tonsil             |
| WR029 (COP-N2)<br>Unknown function                | 1-176 | AHNAK2 (HNAK nucleoprotein 2)                                        | 1472-1624 | Breast_cancer/Prostate_cancer |
|                                                   |       | AP2B1 (adaptor-related protein complex 2, beta 1 subunit, isoform b) | 615-938   | Spleen                        |
|                                                   |       | DEAF1 (deformed epidermal autoregulatory factor 1)                   | 309-566   | Breast_cancer/Prostate_cancer |

|                                                              |      |                                                                                      |           |                               |
|--------------------------------------------------------------|------|--------------------------------------------------------------------------------------|-----------|-------------------------------|
|                                                              |      | EPS8L2 (EPS8-like 2)                                                                 | 48-293    | Tongue_and_Tonsil             |
|                                                              |      | GOLGA2 (Golgi autoantigen, golgin subfamily a, 2)                                    | 166-378   | Breast_cancer/Prostate_cancer |
|                                                              |      | KPNA2 (karyopherin alpha 2)                                                          | 18-530    | Breast_cancer/Prostate_cancer |
|                                                              |      | KPNA5 (karyopherin alpha 5)                                                          | 276-540   | Spleen                        |
|                                                              |      | MFSD3 (major facilitator superfamily domain containing 3)                            | 254-413   | Breast_cancer/Prostate_cancer |
|                                                              |      | MYOM1 (myomesin 1, isoform a)                                                        | 1561-1686 | Tongue_and_Tonsil             |
|                                                              |      |                                                                                      | 1502-1686 | Tongue_and_Tonsil             |
|                                                              |      | PLSCR4 (phospholipid scramblase 4)                                                   | -4-330    | Tongue_and_Tonsil             |
|                                                              |      | PRDX4 (peroxiredoxin 4)                                                              | 29-227    | Spleen                        |
|                                                              |      | R3HCC1 (R3H domain and coiled-coil containing 1)                                     | 120-300   | Breast_cancer/Prostate_cancer |
|                                                              |      | RAI14 (retinoic acid induced 14)                                                     | 836-981   | Breast_cancer/Prostate_cancer |
|                                                              |      |                                                                                      | 845-981   | Spleen                        |
|                                                              |      | SMARCC2 (SWI/SNF related, matrix associated, actin dependent regulator of chromatin) | 901-1051  | Tongue_and_Tonsil             |
|                                                              |      | SON (DNA-binding protein SON, isoform G)                                             | 721-1098  | Breast_cancer/Prostate_cancer |
|                                                              |      | TK1 (thymidine kinase 1)                                                             | 136-235   | Breast_cancer/Prostate_cancer |
|                                                              |      | TXNDC4 (thioredoxin domain containing 4)                                             | 198-407   | Breast_cancer/Prostate_cancer |
|                                                              |      | VCPIP1 [valosin containing protein (p97)/p47 complex]                                | 707-1001  | Tongue_and_Tonsil             |
|                                                              |      |                                                                                      | 821-1040  | Breast_cancer/Prostate_cancer |
| WR034 (COP-K3) interferon resistance; host defense modulator | 1-89 | CIR (CBF1 interacting corepressor)                                                   | 195-400   | Tongue_and_Tonsil             |
|                                                              |      | IL32 (interleukin 32)                                                                | -17-235   | Tongue_and_Tonsil             |
|                                                              |      | LUC7L (LUC7-like,)                                                                   | 185-326   | Breast_cancer/Prostate_cancer |
|                                                              |      | LZTS2 (leucine zipper, putative tumor suppressor 2)                                  | 36-433    | Human-MGC-Derived             |
|                                                              |      |                                                                                      | 88-638    | Human-MGC-Derived             |
|                                                              |      |                                                                                      | 16-670    | Human-MGC-Derived             |

|                                                                                                 |         |                                                                        |           |                               |
|-------------------------------------------------------------------------------------------------|---------|------------------------------------------------------------------------|-----------|-------------------------------|
|                                                                                                 |         |                                                                        | 62-630    | Human-MGC-Derived             |
|                                                                                                 |         |                                                                        | 210-438   | Human-MGC-Derived             |
|                                                                                                 |         |                                                                        | 147-637   | Human-MGC-Derived             |
|                                                                                                 |         | PALMD (Palmdelphin)                                                    | 118-492   | Tongue_and_Tonsil             |
|                                                                                                 |         |                                                                        | 380-552   | Tongue_and_Tonsil             |
|                                                                                                 |         |                                                                        | 76-491    | Tongue_and_Tonsil             |
|                                                                                                 |         | RPS27A (ribosomal protein S27a)                                        | 6-157     | Tongue_and_Tonsil             |
|                                                                                                 |         |                                                                        | 8-157     | Breast_cancer/Prostate_cancer |
|                                                                                                 |         |                                                                        | 10-157    | Spleen                        |
| WR039 (COP-K7)<br>Suppressor of DDX3-mediated IRF activation and INF $\beta$ promoter induction | 1-150   | ARNTL (aryl hydrocarbon receptor nuclear translocator-like, isoform a) | 232-343   | Breast_cancer/Prostate_cancer |
|                                                                                                 |         | COBL1 (COBL-like 1)                                                    | 118-373   | Spleen                        |
|                                                                                                 |         | FLJ10254 (hypothetical protein FLJ10254)                               | 60-274    | Tongue_and_Tonsil             |
|                                                                                                 |         | LAD1 (ladinin 1)                                                       | 14-147    | Breast_cancer/Prostate_cancer |
|                                                                                                 |         | NCOR1 (nuclear receptor corepressor 1)                                 | 2082-2334 | Spleen                        |
|                                                                                                 |         | RILPL1 (Rab interacting lysosomal protein-like 1)                      | 228-594   | Tongue_and_Tonsil             |
|                                                                                                 |         |                                                                        | 205-394   | Spleen                        |
|                                                                                                 |         | RL2A (ribosomal protein L27a)                                          | 17-149    | Breast_cancer/Prostate_cancer |
|                                                                                                 |         | SNX5 (sorting nexin 5)                                                 | -18-246   | Spleen                        |
| TSPYL2 (TSPY-like 2 (cell division autoantigen 1))                                              | 349-535 | Tongue_and_Tonsil                                                      |           |                               |
| WR043 (COP-F4)<br>ribonucleotide reductase small subunit                                        | 1-320   | EIF4G2 (eukaryotic translation initiation factor 4 gamma, 2)           | 367-706   | Breast_cancer/Prostate_cancer |
|                                                                                                 |         | ENAH (enabled homolog, isoform b)                                      | 451-570   | Breast_cancer/Prostate_cancer |
|                                                                                                 |         | GPS2 (G protein pathway suppressor 2)                                  | 75-326    | Tongue_and_Tonsil             |
|                                                                                                 |         | LAMC2 (laminin, gamma 2, isoform b)                                    | 633-1112  | Breast_cancer/Prostate_cancer |
| WR049( COP-F10)<br>ser/thr kinase                                                               | 200-440 | FAM21C (family with sequence similarity 21, member C)                  | 828-1193  | Breast_cancer/Prostate_cancer |

|                                                                                                                                                    |                                   |                                                                         |                                                                      |                                        |                                   |
|----------------------------------------------------------------------------------------------------------------------------------------------------|-----------------------------------|-------------------------------------------------------------------------|----------------------------------------------------------------------|----------------------------------------|-----------------------------------|
| WR059 (COP-E3)<br>Double-stranded RNA binding protein; inhibits antiviral activities of interferon; host-range determinant; host defense modulator | 1-191                             | DHX9 (DEAH (Asp-Glu-Ala-His) box polypeptide 9)                         | 174-300                                                              | Breast_cancer/<br>Prostate_cancer      |                                   |
|                                                                                                                                                    |                                   | MAST1 (microtubule associated serine/threonine kinase 1)                | 662-1390                                                             | Human-MGC-Derived                      |                                   |
|                                                                                                                                                    |                                   |                                                                         | 693-1571                                                             | Human-MGC-Derived                      |                                   |
|                                                                                                                                                    |                                   |                                                                         | 880-1338                                                             | Human-MGC-Derived                      |                                   |
|                                                                                                                                                    |                                   |                                                                         | 652-1355                                                             | Human-MGC-Derived                      |                                   |
|                                                                                                                                                    |                                   |                                                                         | 669-1467                                                             | Human-MGC-Derived                      |                                   |
|                                                                                                                                                    |                                   |                                                                         | 717-1427                                                             | Human-MGC-Derived                      |                                   |
|                                                                                                                                                    |                                   | MAST2 (microtubule associated serine/threonine kinase 2)                | 887-1208                                                             | Breast_cancer/<br>Prostate_cancer      |                                   |
|                                                                                                                                                    |                                   |                                                                         | 1182-1335                                                            | Breast_cancer/<br>Prostate_cancer      |                                   |
|                                                                                                                                                    |                                   | MAST4 (microtubule associated serine/threonine kinase family, member 4) | 358-770                                                              | Breast_cancer/<br>Prostate_cancer      |                                   |
|                                                                                                                                                    |                                   |                                                                         | 396-752                                                              | Breast_cancer/<br>Prostate_cancer      |                                   |
|                                                                                                                                                    |                                   |                                                                         | 487-786                                                              | Breast_cancer/<br>Prostate_cancer      |                                   |
|                                                                                                                                                    |                                   |                                                                         | 410-931                                                              | Breast_cancer/<br>Prostate_cancer      |                                   |
|                                                                                                                                                    |                                   | STAU1 (staufen, RNA binding protein 1)                                  | -73-578                                                              | Tongue_and_<br>Tonsil                  |                                   |
|                                                                                                                                                    |                                   |                                                                         | 148-577                                                              | Breast_cancer/<br>Prostate_cancer      |                                   |
| 171-372                                                                                                                                            | Breast_cancer/<br>Prostate_cancer |                                                                         |                                                                      |                                        |                                   |
| STAU2 (staufen, RNA binding protein, homolog 2)                                                                                                    | 7-480                             | Tongue_and_<br>Tonsil                                                   |                                                                      |                                        |                                   |
| WR063 (COP-E7)<br>Soluble, myristylprotein has N-myristyltransferase target MGxxxS/T/A                                                             | 1-167                             | TRAPPC5 (trafficking protein particle complex 5)                        | -59-189                                                              | Human-MGC-Derived                      |                                   |
|                                                                                                                                                    |                                   |                                                                         | -57-188                                                              | Human-MGC-Derived                      |                                   |
|                                                                                                                                                    |                                   |                                                                         | 5-189                                                                | Human-MGC-Derived                      |                                   |
|                                                                                                                                                    |                                   |                                                                         | -14-189                                                              | Tongue_and_<br>Tonsil                  |                                   |
| WR064 (COP-E8)<br>Membrane protein may help wrap virosome; associates with IV/IMV and cores; F10L kinase substrate                                 | 1-274                             | ATP6V0C (ATPase, H <sup>+</sup> transporting, lysosomal 16kD)           | -34-156                                                              | Spleen                                 |                                   |
|                                                                                                                                                    |                                   |                                                                         | C6ORF166 (chromosome 6 open reading frame 166)                       | 53-204                                 | Spleen                            |
|                                                                                                                                                    |                                   |                                                                         |                                                                      | 830-951                                | Breast_cancer/<br>Prostate_cancer |
|                                                                                                                                                    |                                   |                                                                         | CCDC80 (steroid sensitive gene 1; nuclear envelope protein okuribin) | 757-922                                | Breast_cancer/<br>Prostate_cancer |
|                                                                                                                                                    |                                   |                                                                         |                                                                      | CD2BP2 (CD2 antigen-binding protein 2) | 106-342                           |

|  |                                                                               |          |                               |
|--|-------------------------------------------------------------------------------|----------|-------------------------------|
|  | CRYAB (crystallin, alpha B)                                                   | 57-176   | Tongue_and_Tonsil             |
|  | CTNNB1 (catenin (cadherin-associated protein), beta 1)                        | 466-734  | Spleen                        |
|  |                                                                               | 621-782  | Spleen                        |
|  | GTF3C3 (general transcription factor III C, polypeptide 3)                    | 174-227  | Breast_cancer/Prostate_cancer |
|  | HLA-B (major histocompatibility complex, class I, B)                          | 80-282   | Spleen                        |
|  | JUP (junction plakoglobin)                                                    | 96-732   | Human-MGC-Derived             |
|  |                                                                               | 611-746  | Human-MGC-Derived             |
|  |                                                                               | 7-724    | Human-MGC-Derived             |
|  |                                                                               | 479-746  | Tongue_and_Tonsil             |
|  |                                                                               | 411-739  | Spleen                        |
|  |                                                                               | 531-738  | Breast_cancer/Prostate_cancer |
|  |                                                                               | 513-745  | Breast_cancer/Prostate_cancer |
|  |                                                                               | 410-738  | Spleen                        |
|  | KHDRBS1 (KH domain containing, RNA binding, signal transduction associated 1) | 237-444  | Spleen                        |
|  | KIF2C (kinesin family member 2C)                                              | 37-217   | Breast_cancer/Prostate_cancer |
|  | LARP7 (La ribonucleoprotein domain family, member 7)                          | -5-566   | Breast_cancer/Prostate_cancer |
|  | LPLUNC1 (long palate, lung and nasal epithelium carcinoma associated 1)       | 406-485  | Tongue_and_Tonsil             |
|  |                                                                               | 408-484  | Breast_cancer/Prostate_cancer |
|  | LRIG1 (leucine-rich repeats and immunoglobulin-like domains 1)                | 441-1094 | Tongue_and_Tonsil             |
|  | MBTD1 (mbt domain containing 1)                                               | 200-411  | Spleen                        |
|  | MYOZ1 (myozenin 1)                                                            | 75-300   | Tongue_and_Tonsil             |
|  | NPM1 (nucleophosmin, isoform 1)                                               | -15-69   | Breast_cancer/Prostate_cancer |
|  | OBFC2A (oligonucleotide / oligosaccharide-binding fold containing 2A)         | 152-205  | Spleen                        |

|                                                          |       |                                                                                  |           |                                   |
|----------------------------------------------------------|-------|----------------------------------------------------------------------------------|-----------|-----------------------------------|
|                                                          |       | OTG1 (oocyte-testis gene 1)                                                      | 221-486   | Breast_cancer/<br>Prostate_cancer |
|                                                          |       | P2RX5 (purinergic receptor P2X, ligand-gated ion channel, 5, isoform A)          | 40-208    | Spleen                            |
|                                                          |       |                                                                                  | -40-422   | Spleen                            |
|                                                          |       | PDIA6 (protein disulfide isomerase-associated 6)                                 | 10-188    | Spleen                            |
|                                                          |       | RAB11FIP5 (RAB11 family interacting protein 5)                                   | 513-654   | Spleen                            |
|                                                          |       | RBM12B (RNA binding motif protein 12B)                                           | 520-766   | Spleen                            |
|                                                          |       |                                                                                  | 534-681   | Breast_cancer/<br>Prostate_cancer |
|                                                          |       | RNF11 (ring finger protein 11)                                                   | 106-155   | Spleen                            |
|                                                          |       | SECISBP2L (SECIS bonding protein 2-like)                                         | 25-1057   | Tongue_and_<br>Tonsil             |
|                                                          |       | TPD52 (Tumor protein D52)                                                        | -6-184    | Breast_cancer/<br>Prostate_cancer |
|                                                          |       | UBE3A (ubiquitin protein ligase E3A)                                             | 751-875   | Spleen                            |
| WR065 (COP-E9)<br>DNA polymerase                         | 1-300 | SECISBP2L (SECIS bonding protein 2-like)                                         | 273-1057  | Breast_cancer/<br>Prostate_cancer |
| WR073 (COP-I4)<br>Ribonucleotide reductase large subunit | 1-220 | APPBP2 (amyloid beta precursor protein binding protein 2)                        | 402-510   | Breast_cancer/<br>Prostate_cancer |
|                                                          |       | C6ORF58 (chromosome 6 open reading frame 58)                                     | 57-161    | Tongue_and_<br>Tonsil             |
|                                                          |       | CAND1 (cullin-associated and neddylation-dissociated 1)                          | 1159-1230 | Tongue_and_<br>Tonsil             |
|                                                          |       | CIT (citron)                                                                     | 471-688   | Breast_cancer/<br>Prostate_cancer |
|                                                          |       | FOXP1 (forkhead box P1)                                                          | 168-428   | Tongue_and_<br>Tonsil             |
|                                                          |       |                                                                                  | 154-468   | Spleen                            |
|                                                          |       |                                                                                  | 190-437   | Spleen                            |
|                                                          |       | GOLGA2 (golgi autoantigen, golgin subfamily a, 2)                                | 448-642   | Tongue_and_<br>Tonsil             |
|                                                          |       | HSPB1 (heat shock 27 kD protein 1)                                               | 43-205    | Tongue_and_<br>Tonsil             |
|                                                          |       | LOC124220 (hypothetical protein LOC124220, similar to common salivary protein 1) | -32-173   | Human-MGC-Derived                 |
|                                                          |       |                                                                                  | -32-173   | Human-MGC-Derived                 |
|                                                          |       |                                                                                  | -10-19    | Tongue_and_<br>Tonsil             |
|                                                          |       | RAI14 (retinoic acid induced 14)                                                 | 650-980   | Tongue_and_<br>Tonsil             |



|                                    |       |                                                                                                 |           |                                   |
|------------------------------------|-------|-------------------------------------------------------------------------------------------------|-----------|-----------------------------------|
|                                    |       |                                                                                                 | 842-980   | Breast_cancer/<br>Prostate_cancer |
|                                    |       |                                                                                                 | 782-980   | Spleen                            |
|                                    |       | ZFPM2 (zinc finger protein, multitype 2)                                                        | 657-912   | Tongue_and_<br>Tonsil             |
| WR084 (COP-G6)<br>Unknown function | 1-166 | APPL2 (adaptor protein, phosphotyrosine interaction, PH domain and leucine zipper containing 2) | -36-557   | Spleen                            |
|                                    |       | COL4A3 (collagen, type IV, alpha 3, isoform 4)                                                  | 1309-1442 | Tongue_and_<br>Tonsil             |
|                                    |       | CWF19L2 (CWF19-like 2, cell cycle control)                                                      | 49-130    | Tongue_and_<br>Tonsil             |
|                                    |       | DUSP1 (dual specificity phosphatase 1)                                                          | 243-368   | Tongue_and_<br>Tonsil             |
|                                    |       | HLA-DRA (major histocompatibility complex, class II, DR alpha)                                  | 104-255   | Spleen                            |
|                                    |       | HYPK (Huntingtin interacting protein K)                                                         | 32-130    | Tongue_and_<br>Tonsil             |
|                                    |       | LAP3 (leucine aminopeptidase 3)                                                                 | 489-520   | Spleen                            |
|                                    |       | LCN1 (lipocalin 1 precursor)                                                                    | 94-177    | Tongue_and_<br>Tonsil             |
|                                    |       | LMO7 (LIM domain only 7)                                                                        | 146-317   | Tongue_and_<br>Tonsil             |
|                                    |       | MATN2 (matrilin 2)                                                                              | 19-360    | Tongue_and_<br>Tonsil             |
|                                    |       | NUS1 (nuclear undecaprenyl pyrophosphate synthase 1 homolog)                                    | 160-269   | Tongue_and_<br>Tonsil             |
|                                    |       | QSCN6 (Sulfhydryl oxidase 1 precursor)                                                          | -3-172    | Tongue_and_<br>Tonsil             |
|                                    |       | RPS23 (ribosomal protein S23)                                                                   | -6-144    | Tongue_and_<br>Tonsil             |
|                                    |       | S100A7 (S100 calcium binding protein A7)                                                        | -5-89     | Tongue_and_<br>Tonsil             |
|                                    |       | SBSN (Suprabasin)                                                                               | -5-125    | Tongue_and_T<br>onsil             |
|                                    |       | SON (DNA-binding protein SON)                                                                   | 2081-2386 | Spleen                            |
|                                    |       | ST8SIA4 (ST8 alpha-N-acetylneuraminide alpha-2,8-sialyltransferase 4)                           | -31-258   | Tongue_and_<br>Tonsil             |
|                                    |       | TCHP (trichoplein, keratin filament binding)                                                    | -44-385   | Spleen                            |
|                                    |       | TNNI1 (troponin I, skeletal, slow)                                                              | -15-147   | Tongue_and_<br>Tonsil             |

Protein interactions between Vaccinia and host

|                                                                                                                                                |           |                                                                     |          |                               |
|------------------------------------------------------------------------------------------------------------------------------------------------|-----------|---------------------------------------------------------------------|----------|-------------------------------|
| WR085 (COP-G7)<br>Vaccinia core protein component of the seven protein complex required for virosomal uptake by viral crescents                | 1-372     | PRKAR2A (protein kinase, cAMP-dependent, regulatory, type II alpha) | -28-146  | Tongue_and_Tonsil             |
| WR094 (COP-J2)<br>Thymidine kinase                                                                                                             | 1-178     | PDLIM1 (PDZ and LIM domain 1)                                       | 84-276   | Tongue_and_Tonsil             |
|                                                                                                                                                |           | TK1 (thymidine kinase 1)                                            | 14-235   | Human-MGC-Derived             |
|                                                                                                                                                |           |                                                                     | 6-235    | Human-MGC-Derived             |
|                                                                                                                                                |           |                                                                     | 19-235   | Human-MGC-Derived             |
|                                                                                                                                                |           |                                                                     | -13-235  | Human-MGC-Derived             |
|                                                                                                                                                |           |                                                                     | -12-213  | Human-MGC-Derived             |
|                                                                                                                                                |           |                                                                     | 14-192   | Human-MGC-Derived             |
|                                                                                                                                                |           |                                                                     | -7-235   | Human-MGC-Derived             |
|                                                                                                                                                |           |                                                                     | 13-235   | Human-MGC-Derived             |
|                                                                                                                                                |           |                                                                     | -9-194   | Human-MGC-Derived             |
|                                                                                                                                                |           |                                                                     | -12-235  | Human-MGC-Derived             |
|                                                                                                                                                |           |                                                                     | 13-235   | Human-MGC-Derived             |
|                                                                                                                                                |           |                                                                     | -12-235  | Tongue_and_Tonsil             |
|                                                                                                                                                |           |                                                                     | -9-235   | Breast_cancer/Prostate_cancer |
| ZNF (zinc finger protein)                                                                                                                      | 35-177    | Breast_cancer/Prostate_cancer                                       |          |                               |
| WR106 (COP-D1)<br>Large subunit of mRNA capping enzyme; transcription termination factor VTF                                                   | 1-300     | NOMO1 (nodal modulator 1)                                           | 969-1223 | Breast_cancer/Prostate_cancer |
|                                                                                                                                                |           | NUP62 (nucleoporin, 62 kD)                                          | 330-523  | Tongue_and_Tonsil             |
| WR110 (COP-D5)<br>A DNA-independent NTPase essential for DNA replication. There are 4 ts-mutants. D5 has also been implicated in recombination | 1-300     | ABHD5 (abhydrolase domain containing 5)                             | -16-350  | Spleen                        |
|                                                                                                                                                |           | ANXA1 (annexin A1)                                                  | 86-347   | Tongue_and_Tonsil             |
|                                                                                                                                                |           |                                                                     | 88-347   | Tongue_and_Tonsil             |
|                                                                                                                                                |           |                                                                     | 83-347   | Breast_cancer/Prostate_cancer |
|                                                                                                                                                |           |                                                                     | 86-347   | Breast_cancer/Prostate_cancer |
|                                                                                                                                                |           | ANXA2 (annexin A2,)                                                 | 71-340   | Breast_cancer/Prostate_cancer |
| COL6A3 (alpha 3 type VI collagen, isoform 1)                                                                                                   | 1600-3178 | Spleen                                                              |          |                               |

Protein interactions between Vaccinia and host

|                                                                                                                                               |         |                                                                     |           |                                   |
|-----------------------------------------------------------------------------------------------------------------------------------------------|---------|---------------------------------------------------------------------|-----------|-----------------------------------|
|                                                                                                                                               |         | COPZ1 (coatamer protein complex, subunit zeta 1)                    | -6-178    | Tongue_and_Tonsil                 |
| WR141 (COP-A20)<br>Stoichiometric component of the DNA polymerase processivity factor                                                         | 1-427   | LMNB1 (lamin B1)                                                    | 61-343    | Breast_cancer/<br>Prostate_cancer |
|                                                                                                                                               |         | LMNB2 (lamin B2)                                                    | 51-179    | Breast_cancer/<br>Prostate_cancer |
|                                                                                                                                               |         |                                                                     | 22-229    | Breast_cancer/<br>Prostate_cancer |
| WR142 (COP-A22)<br>A late protein essential for concatemer resolution. An E. coli RuvC-like protein with holliday junction resolvase activity | 1-188   | NUDT5 (nudix (nucleoside diphosphate linked moiety X)-type motif 5) | 22-220    | Tongue_and_Tonsil                 |
| WR150 (COP-A27)<br>IMV surface protein; roles in IMV-cell attachment, fusion, and microtubule transport                                       | 1-111   | BAP1 (BRCA1 associated protein 1)                                   | 485-730   | Tongue_and_Tonsil                 |
|                                                                                                                                               |         | KRT4 (keratin 4)                                                    | 134-415   | Tongue_and_Tonsil                 |
|                                                                                                                                               |         |                                                                     | 215-407   | Tongue_and_Tonsil                 |
|                                                                                                                                               |         | TPM1 (tropomyosin 1 alpha chain)                                    | 81-257    | Tongue_and_Tonsil                 |
|                                                                                                                                               |         |                                                                     | -20-188   | Tongue_and_Tonsil                 |
| UNC84B (unc-84 homolog B)                                                                                                                     | 275-464 | Tongue_and_Tonsil                                                   |           |                                   |
| WR171 (COP-A45)<br>Inactive Cu-Zn superoxide dismutase-like in virion                                                                         | 1-126   | CEP135 [CEP135 (centrosomal protein 4)]                             | 840-1141  | Tongue_and_Tonsil                 |
|                                                                                                                                               |         |                                                                     | 781-931   | Tongue_and_Tonsil                 |
|                                                                                                                                               |         |                                                                     | 725-994   | Tongue_and_Tonsil                 |
|                                                                                                                                               |         | SMAD1 (SMAD1 (MAD homolog 1))                                       | 246-466   | Tongue_and_Tonsil                 |
|                                                                                                                                               |         |                                                                     | 159-466   | Spleen                            |
|                                                                                                                                               |         | TNIP2 (TNFAIP3 interacting protein 2)                               | 262-430   | Spleen                            |
|                                                                                                                                               |         | TRIP11( thyroid hormone receptor interactor 11)                     | 498-781   | Tongue_and_Tonsil                 |
|                                                                                                                                               |         |                                                                     | 1630-1801 | Spleen                            |
|                                                                                                                                               |         | UTRN (Utrophin)                                                     | 1489-1843 | Tongue_and_Tonsil                 |
| WR174 (COP-A48)<br>Thymidylate kinase                                                                                                         | 1-228   | BIN1 (bridging integrator 1)                                        | 6-182     | Tongue_and_Tonsil                 |
|                                                                                                                                               |         | C19ORF60 (chromosome 19 open reading frame 6, alt. transcript)      | 3-180     | Tongue_and_Tonsil                 |

|                                                                                                      |         |                                                                             |           |                               |
|------------------------------------------------------------------------------------------------------|---------|-----------------------------------------------------------------------------|-----------|-------------------------------|
| WR195 (COP-B13)<br>SPI-2/CrmA inhibits Fas-mediated apoptosis, IL-1 convertase, lipoxygenase pathway | 1-346   | MIA3 (melanoma inhibitory activity family, member 3)                        | 1489-1653 | Tongue_and_Tonsil             |
|                                                                                                      |         | SLK [STE20-like kinase, alt. transcript (serine/threonine kinase)]          | 925-1152  | Tongue_and_Tonsil             |
|                                                                                                      |         |                                                                             | 929-1152  | Tongue_and_Tonsil             |
| WR196 (COP-B14)<br>I $\kappa$ B kinase inhibitor                                                     | 1-150   | CDR2 (paraneoplastic cerebellar degeneration-associated antigen)            | 103-444   | Tongue_and_Tonsil             |
|                                                                                                      |         | KIAA0323 (hypothetical protein KIAA0323)                                    | 373-602   | Human-MGC-Derived             |
|                                                                                                      |         |                                                                             | 138-679   | Human-MGC-Derived             |
|                                                                                                      |         |                                                                             | 138-679   | Human-MGC-Derived             |
|                                                                                                      |         |                                                                             | 388-679   | Spleen                        |
| N4BP1 (Nedd4 binding protein 1)                                                                      | 604-897 | Breast_cancer/Prostate_cancer                                               |           |                               |
| WR209 (no COP-ortholog)<br>Unknown function                                                          | 1-332   | EGLN1 [EGL nine (C. elegans) homolog 1]                                     | 158-426   | Spleen                        |
|                                                                                                      |         | F8 (coagulation factor VIII)                                                | 926-1218  | Spleen                        |
| WR227 (no COP ortholog)<br>Unknown function                                                          | 1-73    | ATP2A3 (ATPase, Ca <sup>++</sup> transporting, ubiquitous, isoform a)       | 36-206    | Tongue_and_Tonsil             |
| WR242 (no COP ortholog)<br>Unknown function                                                          | 1-116   | CAMLG (calcium modulating ligand)                                           | -12-165   | Spleen                        |
| WR258 (no COP ortholog)<br>Unknown function                                                          | 1-58    | SET (SET translocation, myeloid leukemia-associated, alt. transcript alpha) | 112-247   | Breast_cancer/Prostate_cancer |
| WR282 (no COP ortholog)<br>Unknown function                                                          | 1-61    | STAT4 (signal transducer and activator of transcription 4)                  | 479-679   | Spleen                        |

WR: Western Reserve strain, COP: Copenhagen strain.
